# Supplementary material for: Using Machine Learning Methods to Study Colorectal Cancer Tumor Micro-Environment and Its Biomarkers
Source: MDPI journal article supplement (doi:10.3390/ijms241311133), 2023-07-06
Supplement: s1 [file s1]

**Table S1.** Top 20 feature rankings of DS1 based on four feature selection algorithms. The table displays the top 20 features selected by each algorithm in descending order of importance, along with their corresponding ranking score. The four algorithms used are MCFS, Boruta, mRMR and lightGBM. Each feature is assigned a score based on its importance in the respective algorithm, with higher scores indicating greater importance. RI represents the relative importance of feature.

| rank | MCFS     |        | Boruta   |       | mRMR     |        | lightGBM |    |
|------|----------|--------|----------|-------|----------|--------|----------|----|
|      | symbol   | RI     | symbol   | RI    | symbol   | RI     | symbol   | RI |
| 1    | GUCA2A   | 0.3659 | GUCA2A   | 5.849 | IGHA1    | 0.4016 | C1orf107 | 32 |
| 2    | IGHA1    | 0.3227 | IGHA1    | 5.411 | SCGN     | 0.0908 | KRT24    | 26 |
| 3    | GUCA2B   | 0.3191 | ARNTL2   | 5.191 | ABCG2    | 0.0849 | INHBA    | 22 |
| 4    | CA7      | 0.3026 | INHBA    | 5.153 | KRT24    | 0.0727 | PRPF4    | 21 |
| 5    | SPIB     | 0.2789 | GUCA2B   | 5.013 | CA1      | 0.0683 | GPT      | 15 |
| 6    | INHBA    | 0.2754 | KRT24    | 4.796 | INHBA    | 0.0636 | VAV1     | 14 |
| 7    | ZZEF1    | 0.2628 | CA1      | 4.692 | AQP8     | 0.0624 | CA7      | 13 |
| 8    | PADI2    | 0.2500 | AQP8     | 4.677 | CA7      | 0.0620 | FOXO1A   | 13 |
| 9    | CA1      | 0.2456 | CA7      | 4.611 | SPIB     | 0.0615 | NEDD4    | 12 |
| 10   | AQP8     | 0.2428 | SPIB     | 4.590 | GUCA2B   | 0.0592 | MAOA     | 11 |
| 11   | LOC63928 | 0.2412 | PITPNC1  | 4.176 | PDE9A    | 0.0587 | CAMK2N1  | 11 |
| 12   | PLCE1    | 0.2410 | ABCG2    | 4.071 | SPINK2   | 0.0587 | IGHA1    | 11 |
| 13   | ARNTL2   | 0.2373 | KIAA1199 | 4.049 | TRIB3    | 0.0578 | PRKCB1   | 10 |
| 14   | ABCG2    | 0.2355 | NEDD4    | 4.027 | GPT      | 0.0570 | AQP8     | 9  |
| 15   | PDCD4    | 0.2205 | ZZEF1    | 3.950 | MMP7     | 0.0567 | ARNTL2   | 9  |
| 16   | KRT24    | 0.2202 | LOC63928 | 3.868 | CFI      | 0.0564 | COBLL1   | 9  |
| 17   | CDH3     | 0.2092 | HIG2     | 3.849 | KIAA1199 | 0.0561 | PCSK1N   | 8  |
| 18   | MS4A12   | 0.1962 | PADI2    | 3.767 | ADAM28   | 0.0555 | PIK3R3   | 8  |
| 19   | BMP2     | 0.1914 | SOX4     | 3.745 | SST      | 0.0555 | ITM2A    | 7  |
| 20   | KIAA1199 | 0.1899 | CDH3     | 3.703 | DUSP14   | 0.0541 | GUCA2A   | 42 |

**Table S2.** Top 20 feature rankings of DS2 based on four feature selection algorithms. The table displays the top 20 features selected by each algorithm in descending order of importance, along with their corresponding ranking score. The four algorithms used are MCFS, Boruta, mRMR and lightGBM. Each feature is assigned a score based on its importance in the respective algorithm, with higher scores indicating greater importance. RI represents the relative importance of feature.

| rank | MCFS   |        | Boruta    |       | mRMR      |        | lightGBM |     |
|------|--------|--------|-----------|-------|-----------|--------|----------|-----|
|      | symbol | RI     | symbol    | RI    | symbol    | RI     | symbol   | RI  |
| 1    | VARs   | 0.8617 | MRPS17    | 3.619 | UBE2T     | 0.8726 | AIMP2    | 167 |
| 2    | CCT3   | 0.8591 | CCT3      | 3.583 | ATIC      | 0.2124 | ANLN     | 96  |
| 3    | AIMP2  | 0.8516 | UBE2T     | 3.572 | LOC144571 | 0.1903 | A1BG     | 57  |
| 4    | ATIC   | 0.8503 | TRIP13    | 3.564 | C14orf139 | 0.1870 | ASPM     | 52  |
| 5    | IQGAP3 | 0.8365 | FDPS      | 3.556 | FNBP1     | 0.1869 | A1CF     | 34  |
| 6    | ASPM   | 0.8284 | AIMP2     | 3.555 | SLC19A1   | 0.1866 | A2BP1    | 20  |
| 7    | BUD31  | 0.8210 | ATIC      | 3.553 | PTGDS     | 0.1864 | ATIC     | 18  |
| 8    | FAM83H | 0.8113 | IQGAP3    | 3.538 | CENPF     | 0.1864 | A2LD1    | 11  |
| 9    | UBE2T  | 0.8092 | ANLN      | 3.535 | PKP3      | 0.1861 | A2M      | 7   |
| 10   | MAD2L1 | 0.8087 | VARs      | 3.513 | PLK1      | 0.1856 | ANK2     | 5   |
| 11   | TRIP13 | 0.8062 | FAM83H    | 3.511 | ASPM      | 0.1842 | BUD31    | 5   |
| 12   | TOP2A  | 0.7956 | MAD2L1    | 3.503 | C20orf20  | 0.1829 | FAM83H   | 4   |
| 13   | ANLN   | 0.7854 | ASPM      | 3.501 | UCK2      | 0.1825 | A4GALT   | 4   |
| 14   | FDPS   | 0.7788 | BUD31     | 3.482 | SSBP2     | 0.1823 | CCT3     | 4   |
| 15   | CDK5   | 0.7446 | TOP2A     | 3.474 | HMGA1     | 0.1822 | TMCO6    | 2   |
| 16   | MRPS17 | 0.7441 | HIST1H2BG | 2.919 | AURKB     | 0.1820 | FDPS     | 2   |
| 17   | FAM54A | 0.7109 | MCM7      | 2.680 | GSTP1     | 0.1819 | C21orf33 | 2   |
| 18   | CDK1   | 0.6990 | RUVBL1    | 2.628 | RAN       | 0.1817 | LUC7L3   | 2   |
| 19   | TRAP1  | 0.6879 | POLD2     | 2.626 | SQLE      | 0.1814 | EIF5A2   | 2   |
| 20   | RUVBL1 | 0.6827 | CDK1      | 2.534 | EVI2B     | 0.1814 | ASAP3    | 2   |

**Table S3.** Top 20 feature rankings of DS3 based on four feature selection algorithms. The table displays the top 20 features selected by each algorithm in descending order of importance, along with their corresponding ranking score. The four algorithms used are MCFS, Boruta, mRMR and lightGBM. Each feature is assigned a score based on its importance in the respective algorithm, with higher scores indicating greater importance. RI represents the relative importance of feature.

| rank | MCFS     |        | Boruta   |       | mRMR      |        | lightGBM |    |
|------|----------|--------|----------|-------|-----------|--------|----------|----|
|      | symbol   | RI     | symbol   | RI    | symbol    | RI     | symbol   | RI |
| 1    | TSPAN6   | 0.8765 | TMEM132A | 4.186 | C1orf112  | 1.2427 | TNMD     | 87 |
| 2    | TNMD     | 0.8654 | CELSR3   | 4.172 | STPG1     | 0.2175 | STPG1    | 64 |
| 3    | DPM1     | 0.7602 | STMN4    | 4.168 | LAS1L     | 0.2145 | NIPAL3   | 60 |
| 4    | SCYL3    | 0.7209 | TOMM34   | 3.916 | DBNDD1    | 0.2137 | CFTR     | 40 |
| 5    | C1orf112 | 0.6568 | CD44     | 3.884 | PDK4      | 0.2084 | ANKIB1   | 38 |
| 6    | FGR      | 0.6286 | MUSK     | 3.772 | ABCB5     | 0.2082 | TMEM176A | 34 |
| 7    | CFH      | 0.6270 | USP2     | 3.686 | ST7       | 0.2081 | M6PR     | 33 |
| 8    | FUCA2    | 0.6250 | GUCA2B   | 3.658 | PRSS22    | 0.2076 | ALS2     | 31 |
| 9    | GCLC     | 0.5967 | NEXMIF   | 3.652 | PRKAR2B   | 0.2071 | ZMYND10  | 31 |
| 10   | NFYA     | 0.5890 | NFE2L3   | 3.639 | ABCC8     | 0.2067 | CDC27    | 27 |
| 11   | STPG1    | 0.5834 | COL11A1  | 3.573 | TMEM132A  | 0.2066 | ACSM3    | 26 |
| 12   | NIPAL3   | 0.5795 | CDH3     | 3.481 | ZNF263    | 0.2066 | FAM214B  | 26 |
| 13   | LAS1L    | 0.5400 | GLP2R    | 3.475 | TNFRSF12A | 0.2060 | WDR54    | 23 |
| 14   | ENPP4    | 0.5108 | PLPP1    | 3.330 | GGCT      | 0.2059 | SOX8     | 23 |
| 15   | SEMA3F   | 0.4977 | CBFB     | 3.301 | GTF2IRD1  | 0.2057 | ZNF195   | 21 |
| 16   | CFTR     | 0.4909 | ATP11A   | 3.292 | ARHGAP44  | 0.2056 | ITGAL    | 21 |
| 17   | ANKIB1   | 0.4545 | OSBPL3   | 3.248 | SCIN      | 0.2055 | CRLF1    | 19 |
| 18   | CYP51A1  | 0.4497 | TRIP13   | 3.205 | CEACAM7   | 0.2053 | ABCC8    | 19 |
| 19   | KRIT1    | 0.4327 | PPP2R3A  | 3.079 | CELSR3    | 0.2053 | TMEM132A | 18 |
| 20   | RAD52    | 0.4250 | CELSR1   | 3.068 | MLXIPL    | 0.2052 | CX3CL1   | 16 |

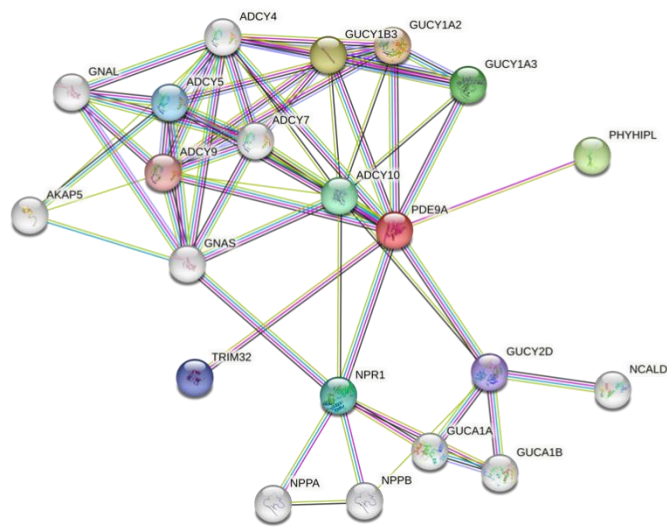

**Figure S1. Protein Interaction Network of PDE9A.** The figure displays the proteins that interact with PDE9A and their associated molecular functions and biological processes. Molecular functions enriched in this network include guanylate cyclase activity and adenylate cyclase activity, while enriched biological processes include nitric oxide trans-synaptic signal regulation, synapse delivery, and cGMP biosynthesis process. Additionally, KEGG pathway enrichment analysis shows a significant association with the regulation of lipolysis in adipocytes, among others.

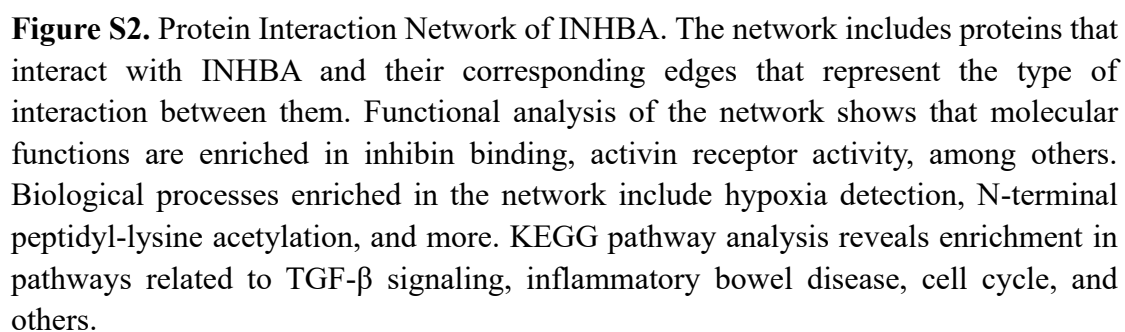

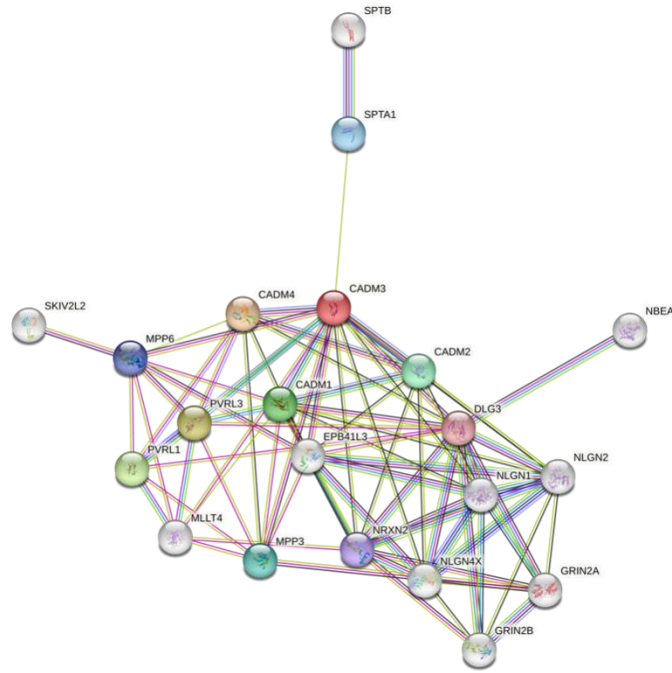

**Figure S3. Protein interaction network of CADM3.** The molecular functions enriched among these proteins include glutamate-gated calcium ion channel activity and glutamate receptor activity. The biological process enriched is Gephyrin clustering involved in postsynaptic density assembly. Additionally, the KEGG pathway analysis shows an enrichment in adipocyte adhesion molecules.

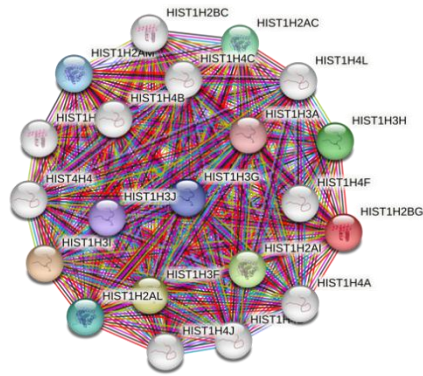

**Figure S4.** Protein interaction network of HIST1H2BG. The functional analysis of the network reveals that among the proteins interacting with HIST1H2BG, molecular functions are enriched in protein heterodimerization activity, cadherin binding, and other functions. Biological processes enriched in the network include negative regulation of megakaryocyte differentiation, DNA replication-dependent nucleosome assembly, and other processes.

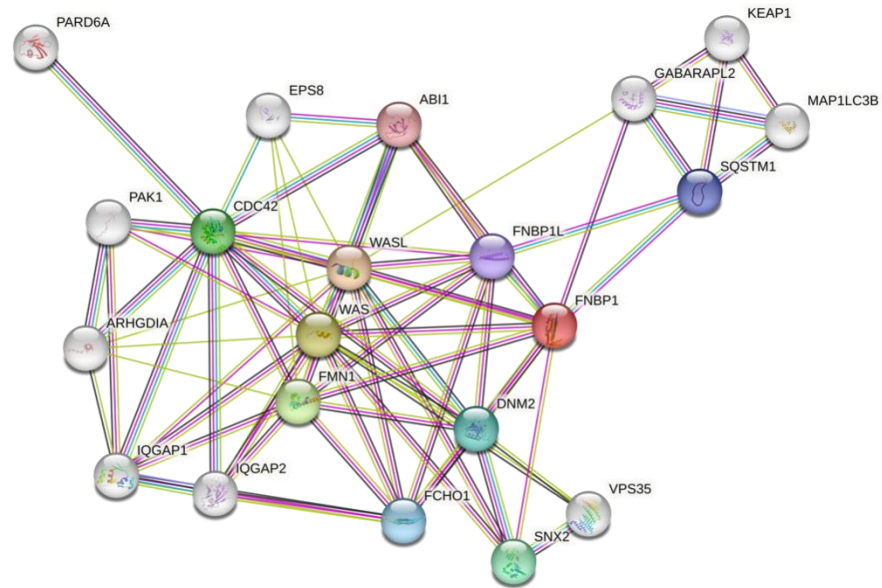

**Figure S5.** Protein interaction network of FBNP1. Functional analysis of these proteins revealed enrichment in molecular functions such as GTPase inhibitor activity and dopamine receptor binding, and biological processes such as negative regulation of membrane tubes and positive regulation of clathrin-dependent endocytosis. Additionally, KEGG pathway analysis showed enrichment for adherens junctions and FcγR-mediated phagocytosis.



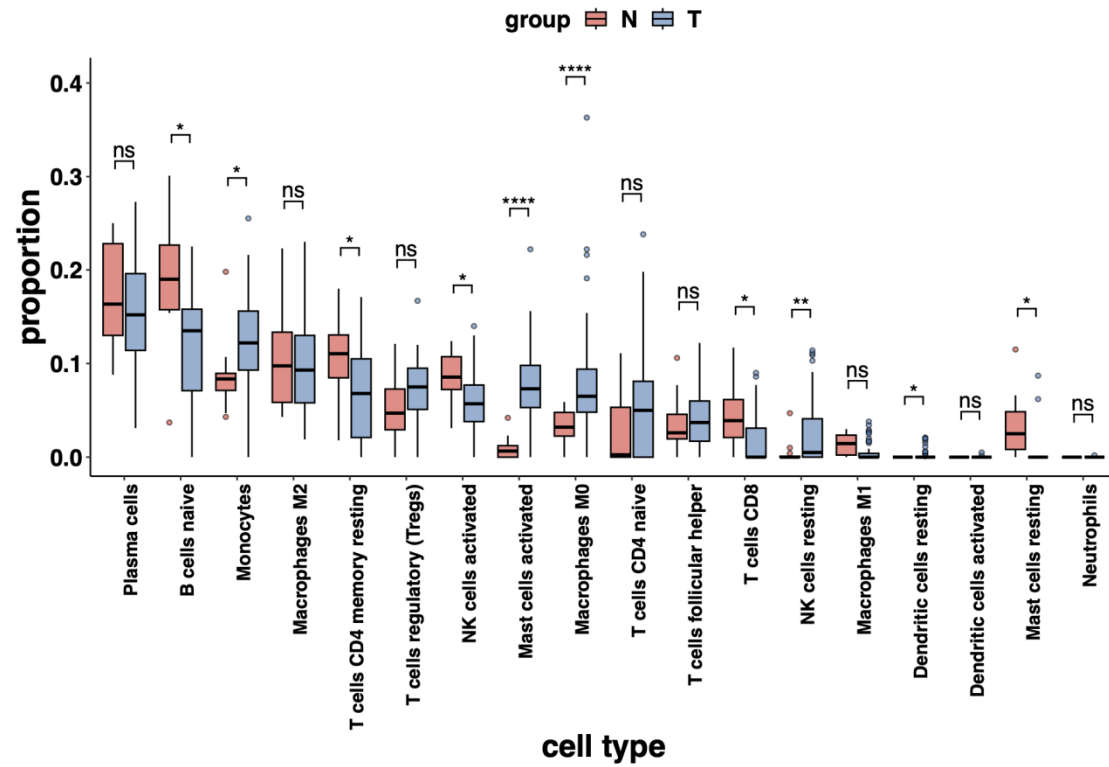

**Figure S6.** Distribution of immune cells and differential analysis in DS2. The bar plots show the proportion of immune cell types in normal (red) and tumor (blue) tissues. Statistical analysis was performed to identify significant differences between the two tissue types. The significance levels are denoted by the following symbols: ns (not significant); \* ( $0.01 < p < 0.05$ ); \*\* ( $0.001 < p < 0.01$ ); \*\*\* ( $0.0001 < p < 0.001$ ); \*\*\*\* ( $p < 0.0001$ ).

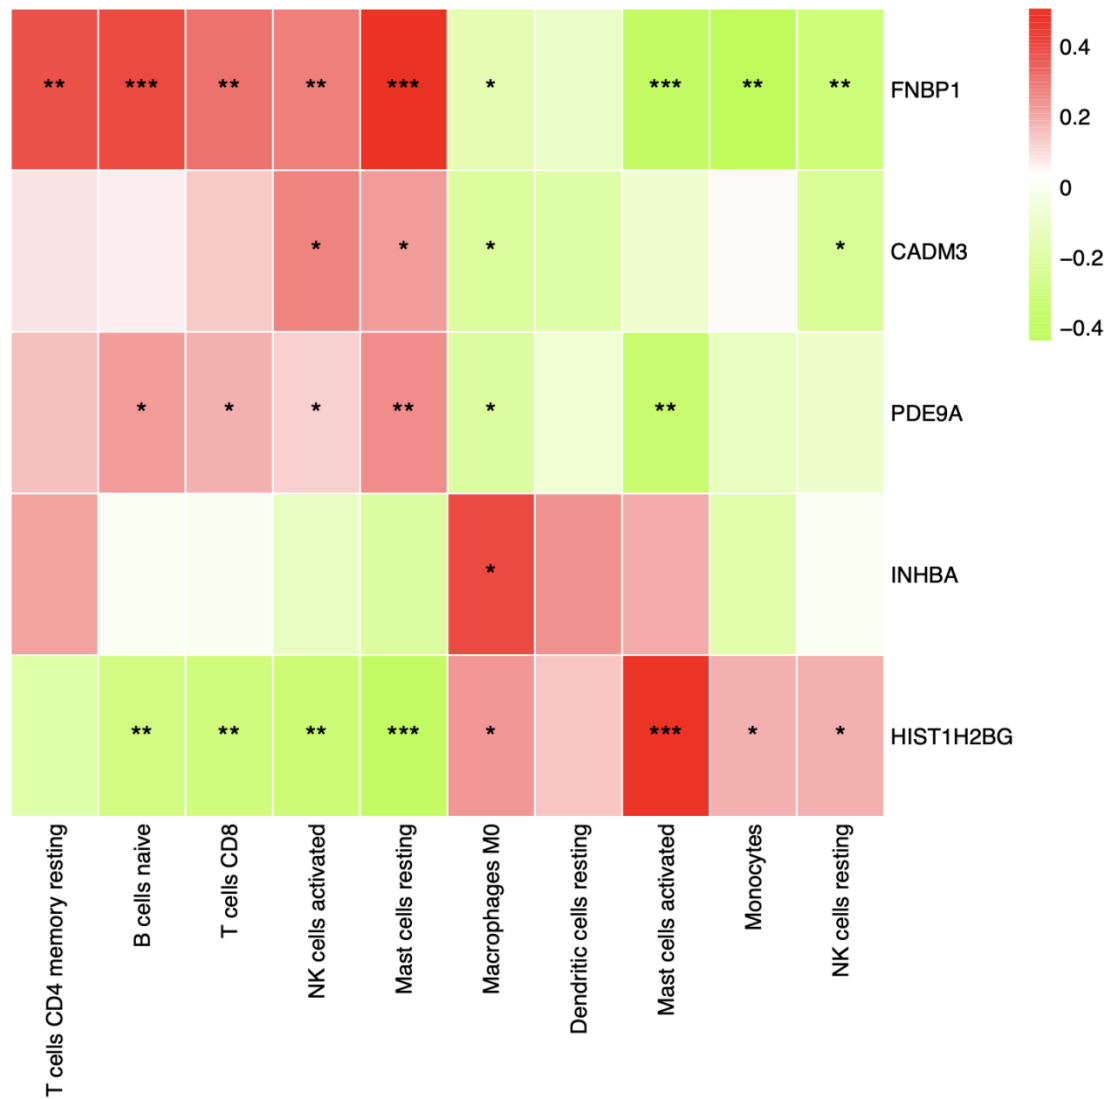

**Figure S7.** Heatmap showing the correlation between the expression levels of 5 key genes and the frequencies of differential immune cell types in DS2. The color scale represents the magnitude of the Pearson correlation coefficient, with red indicating a positive correlation and blue indicating a negative correlation; \*:  $0.01 < p < 0.05$ ; \*\*:  $0.001 < p < 0.01$ ; \*\*\*:  $0.0001 < p < 0.001$ ; \*\*\*\*:  $p < 0.0001$ .

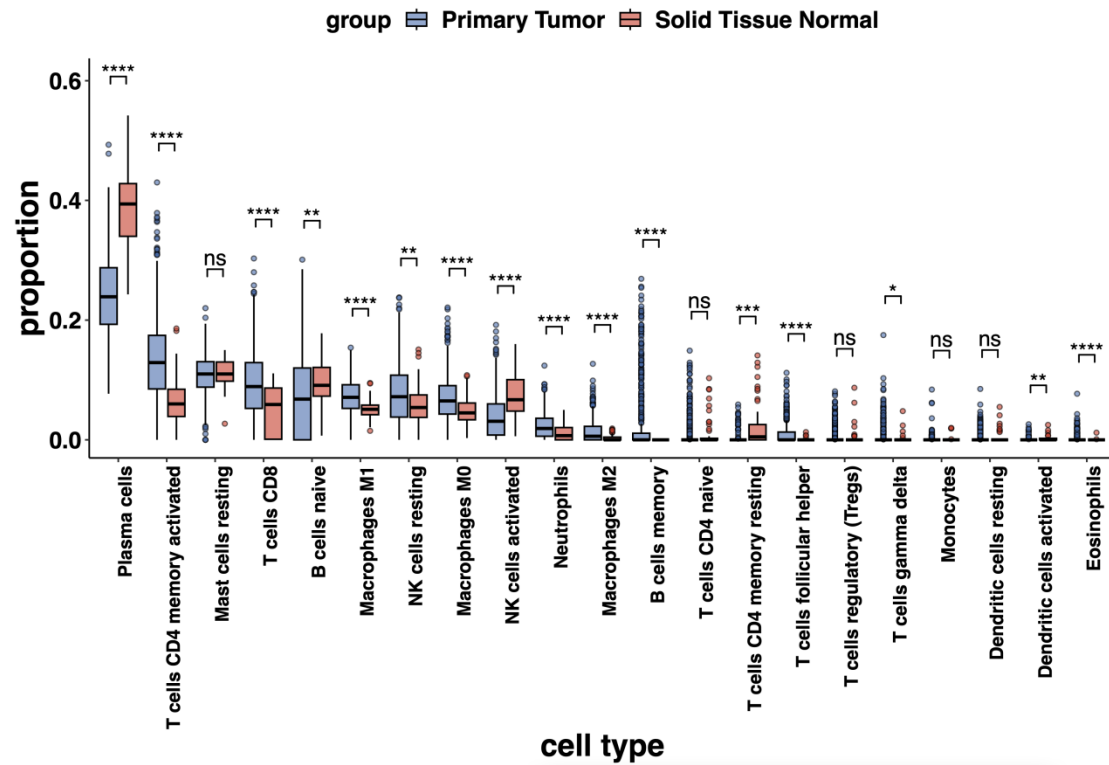

**Figure S8.** Distribution of immune cells and differential analysis in DS3. The bar plots show the proportion of immune cell types in normal (red) and tumor (blue) tissues. Statistical analysis was performed to identify significant differences between the two tissue types. The significance levels are denoted by the following symbols: ns (not significant); \* ( $0.01 < p < 0.05$ ); \*\* ( $0.001 < p < 0.01$ ); \*\*\* ( $0.0001 < p < 0.001$ ); \*\*\*\* ( $p < 0.0001$ ).

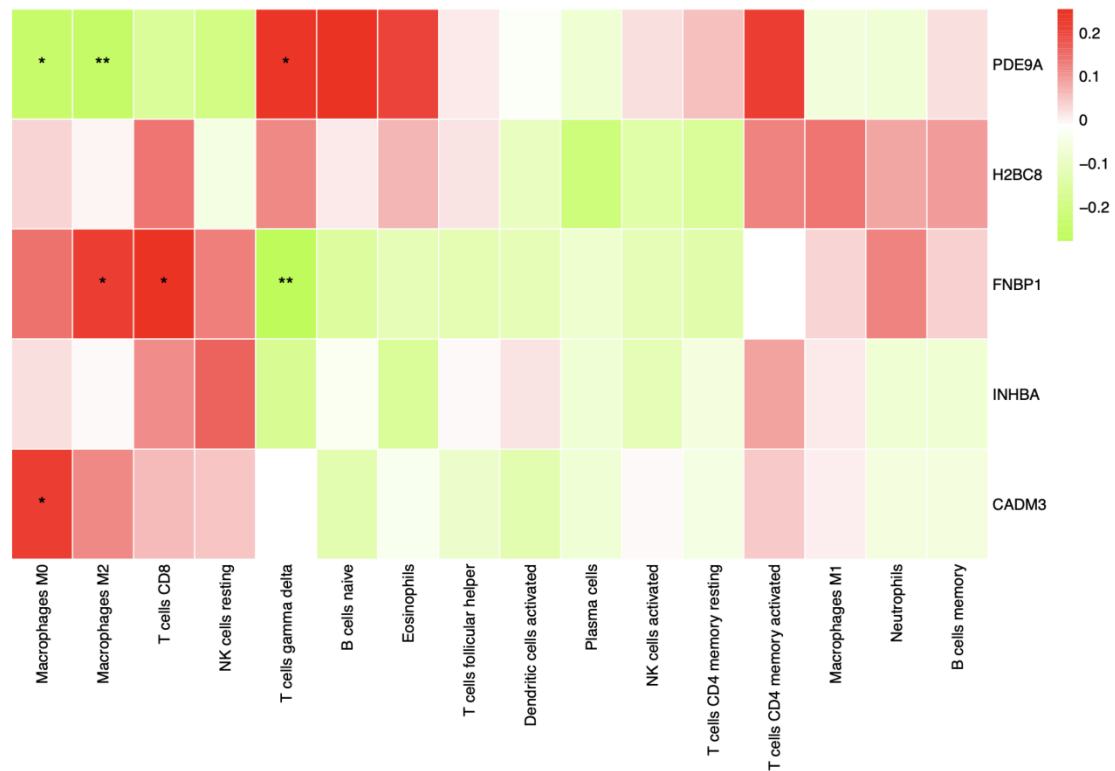

**Figure S9.** Heatmap showing the correlation between the expression levels of 5 key genes and the frequencies of differential immune cell types in DS3. The color scale represents the magnitude of the Pearson correlation coefficient, with red indicating a positive correlation and blue indicating a negative correlation; \*:  $0.01 < p < 0.05$ ; \*\*:  $0.001 < p < 0.01$ ; \*\*\*:  $0.0001 < p < 0.001$ ; \*\*\*\*:  $p < 0.0001$ .
